# Supplementary material for: De novo synthesis of D- and L-fucosamine containing disaccharides
Source: PubMed Central journal article supplement (PMC3596053; doi:10.3762/bjoc.9.38), 2013-02-14
Supplement: Beilstein_J_Org_Chem-09-332-s001.pdf [file Beilstein_J_Org_Chem-09-332-s001.pdf]

## Supporting Information

for

# ***De novo* synthesis of D- and L-fucosamine containing disaccharides**

Daniele Leonori<sup>1,§</sup> and Peter H. Seeberger<sup>\*1,2</sup>

Address: <sup>1</sup>Department of Biomolecular Systems, Max Planck Institute of Colloids and Interfaces, Am Mühlenberg 1, 14476 Potsdam, Germany and

<sup>2</sup>Institute for Chemistry and Biochemistry, Freie Universität Berlin, Arnimallee

22, 14195 Berlin, Germany; <sup>§</sup>Current Address: School of Chemistry,

University of Bristol, Cantock's Close, Bristol, BS8 1TS, UK.

Email: Peter H. Seeberger - peter.seeberger@mpikg.mpg.de

\* Corresponding author

**<sup>1</sup>H NMR, COSY, <sup>13</sup>C NMR and HSQC spectra and the crystallographic  
data file for D-8b.**

### **Table of Contents:**

|                                                          |            |
|----------------------------------------------------------|------------|
| <b><sup>1</sup>H, <sup>13</sup>C, COSY, HSQC spectra</b> | <b>S2</b>  |
| <b>X-ray structure of D-8b</b>                           | <b>S15</b> |

# $^1\text{H}$ , $^{13}\text{C}$ , COSY and HSQC spectra

D-13,  $^1\text{H}$  NMR, 400 MHz,  $\text{D}_2\text{O}$

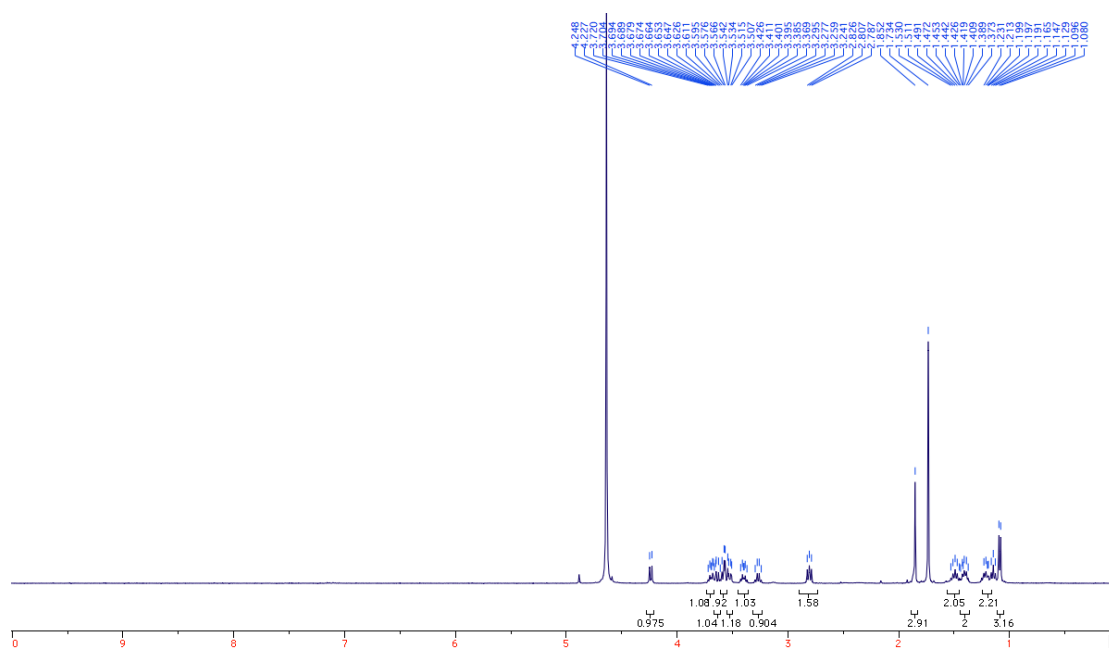

D-13, COSY, 400 MHz,  $\text{D}_2\text{O}$

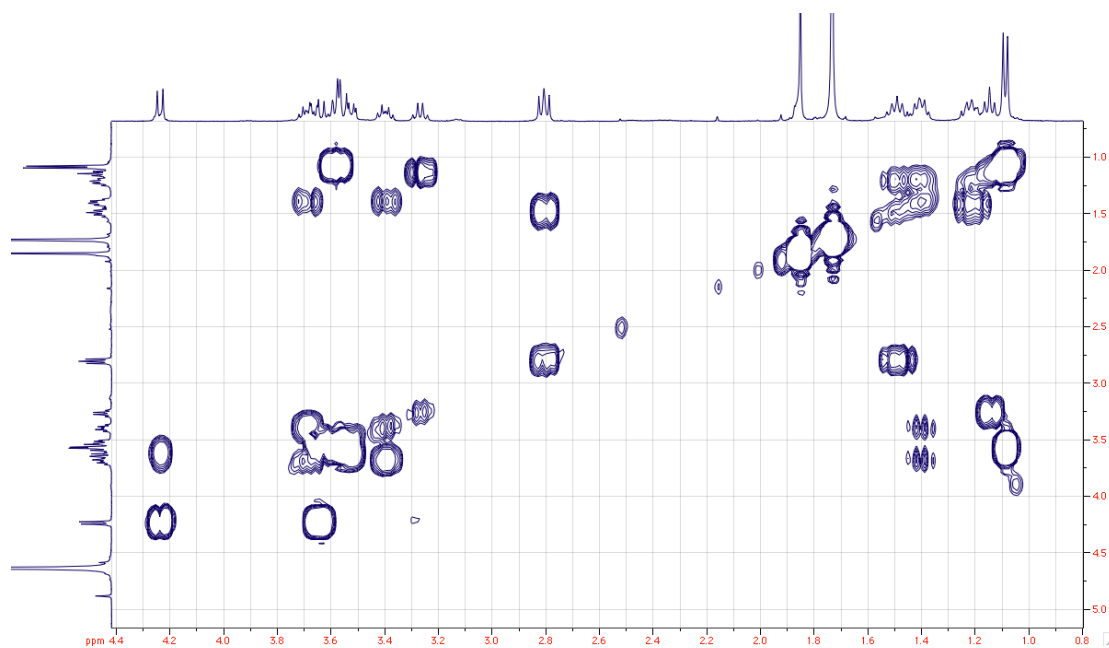

D-13,  $^{13}\text{C}$  NMR, 100 MHz,  $\text{D}_2\text{O}$

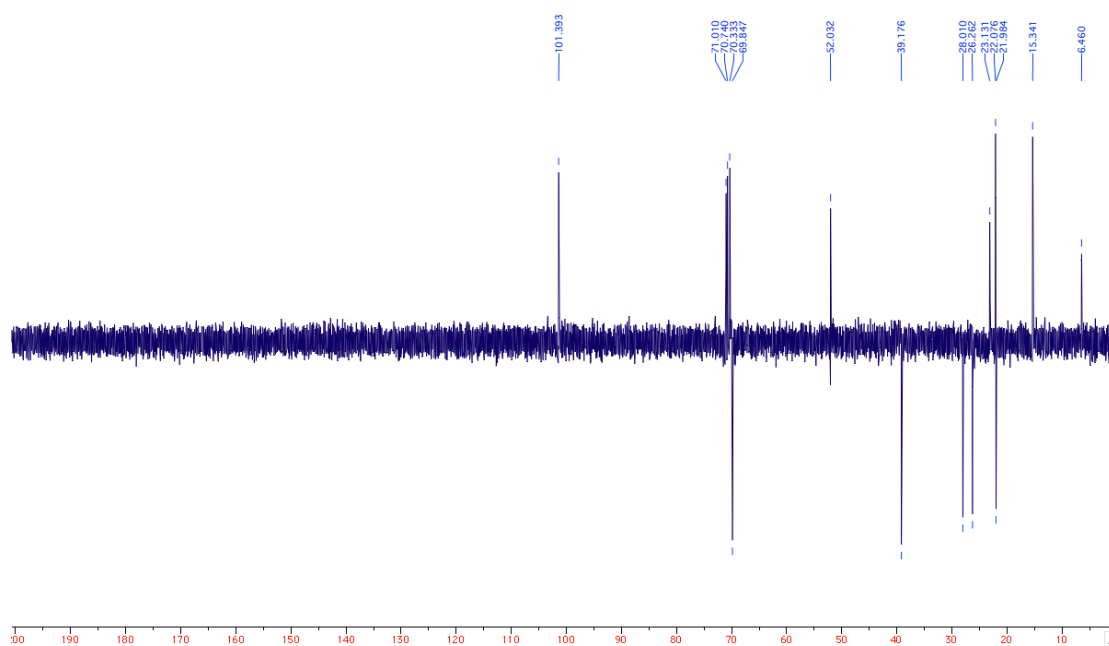

D-13, HSQC NMR, 400 MHz,  $\text{D}_2\text{O}$

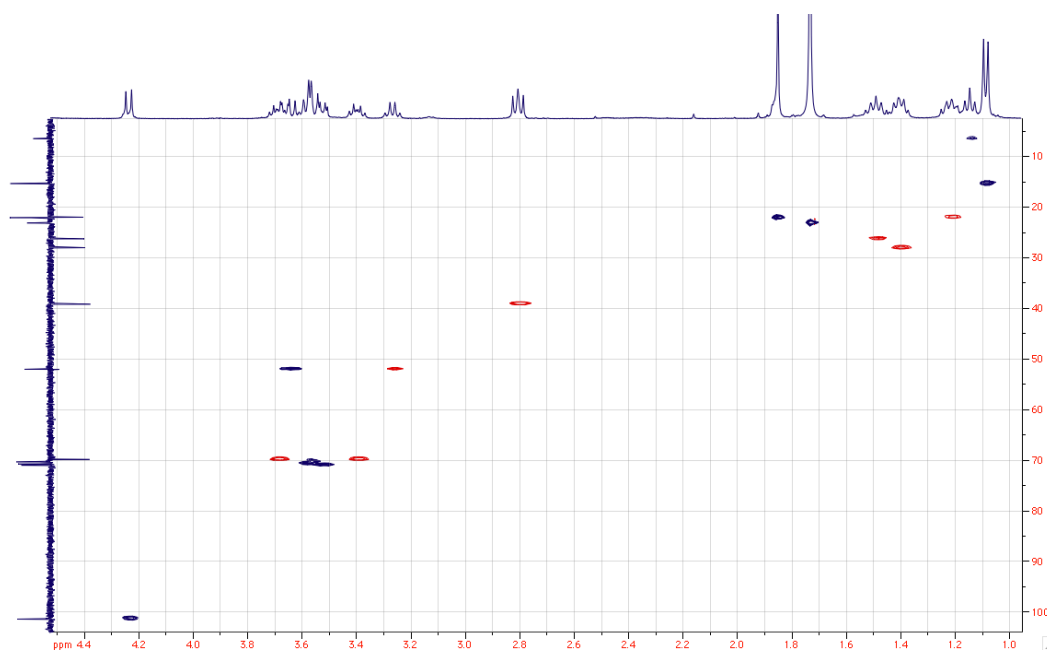

D-13, Coupled HSQC NMR, 400 MHz, D<sub>2</sub>O

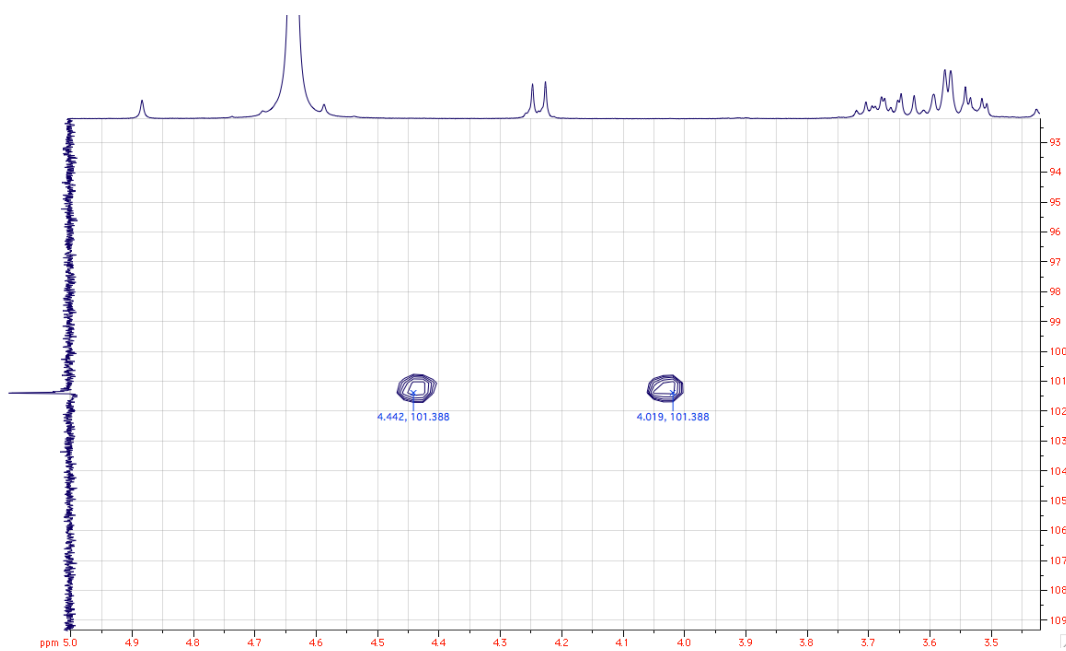

17,  $^1\text{H}$  NMR, 400 MHz,  $\text{D}_2\text{O}$

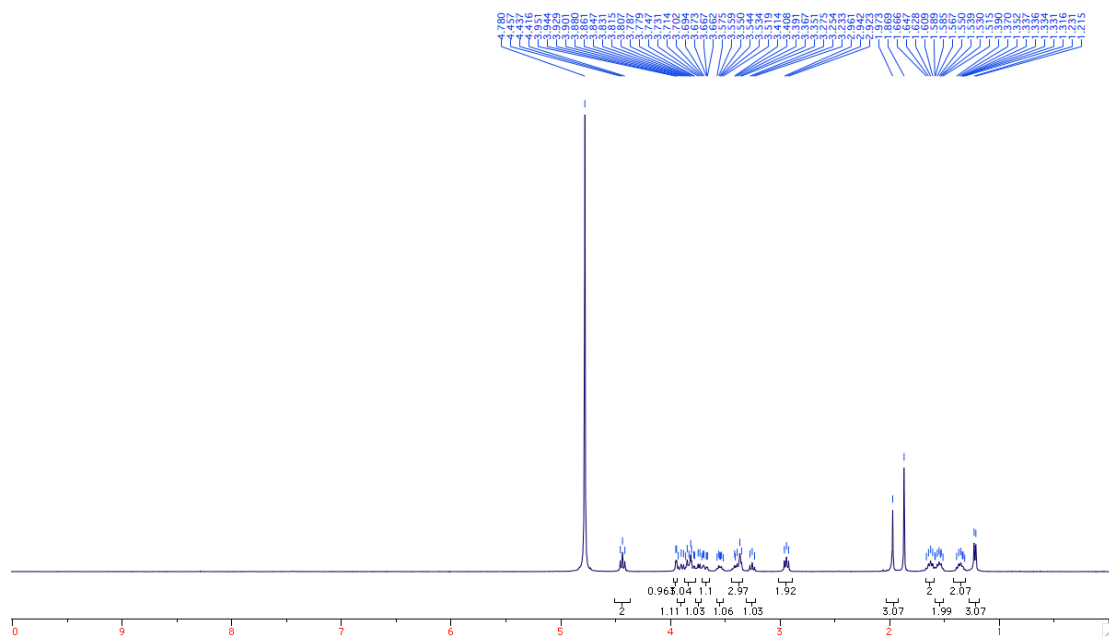

17, COSY NMR, 400 MHz,  $\text{D}_2\text{O}$

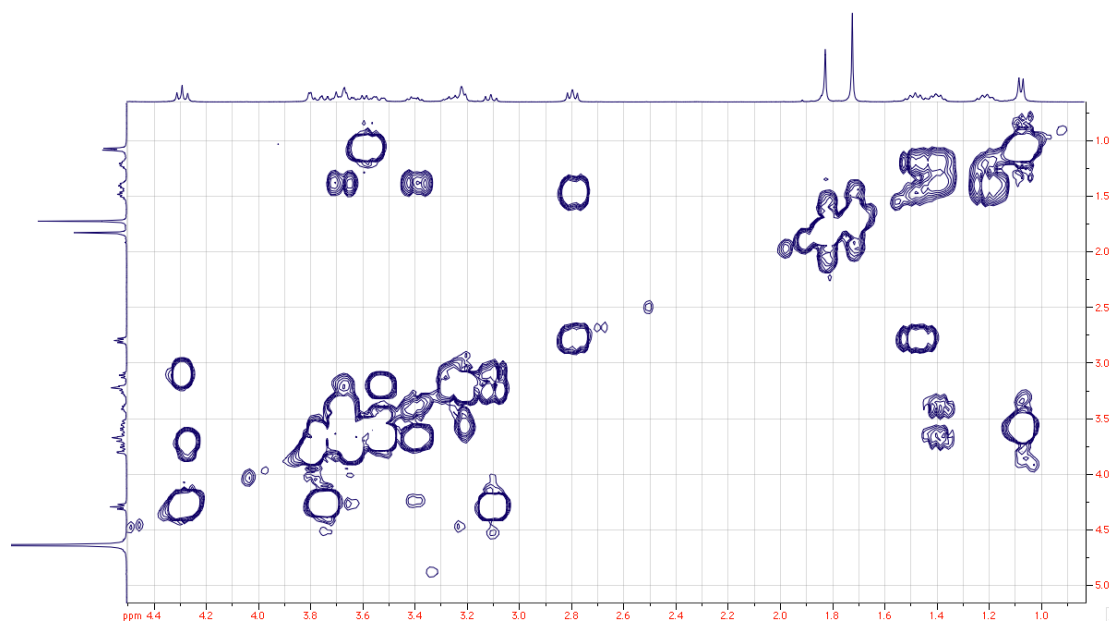

17,  $^{13}\text{C}$  NMR, 400 MHz,  $\text{D}_2\text{O}$

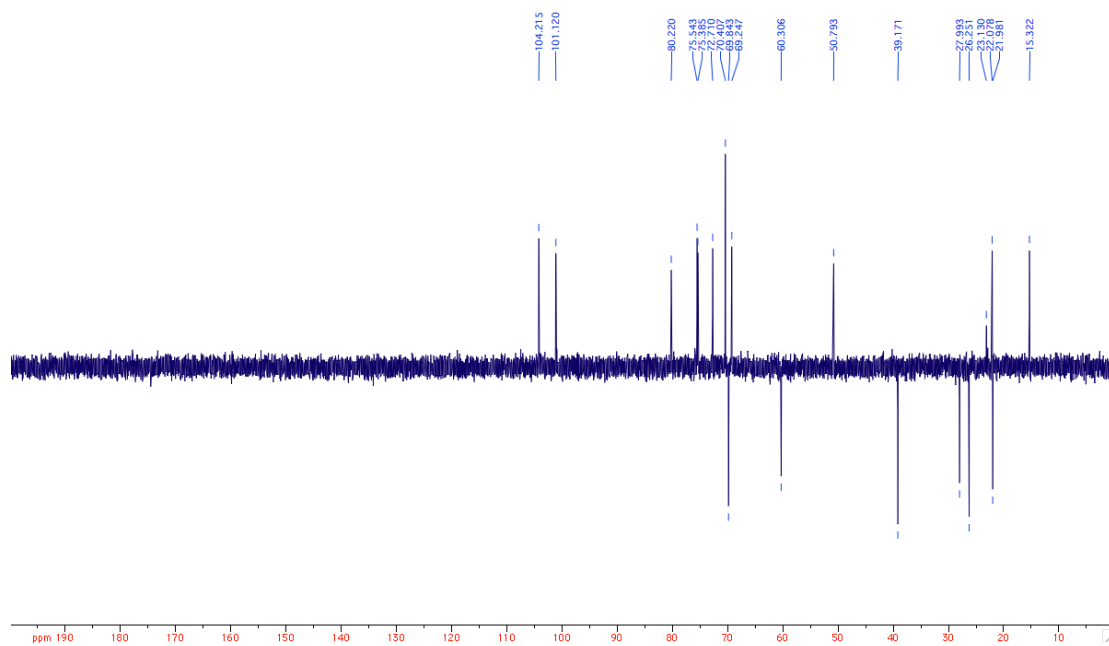

17, HSQC NMR, 400 MHz,  $\text{D}_2\text{O}$

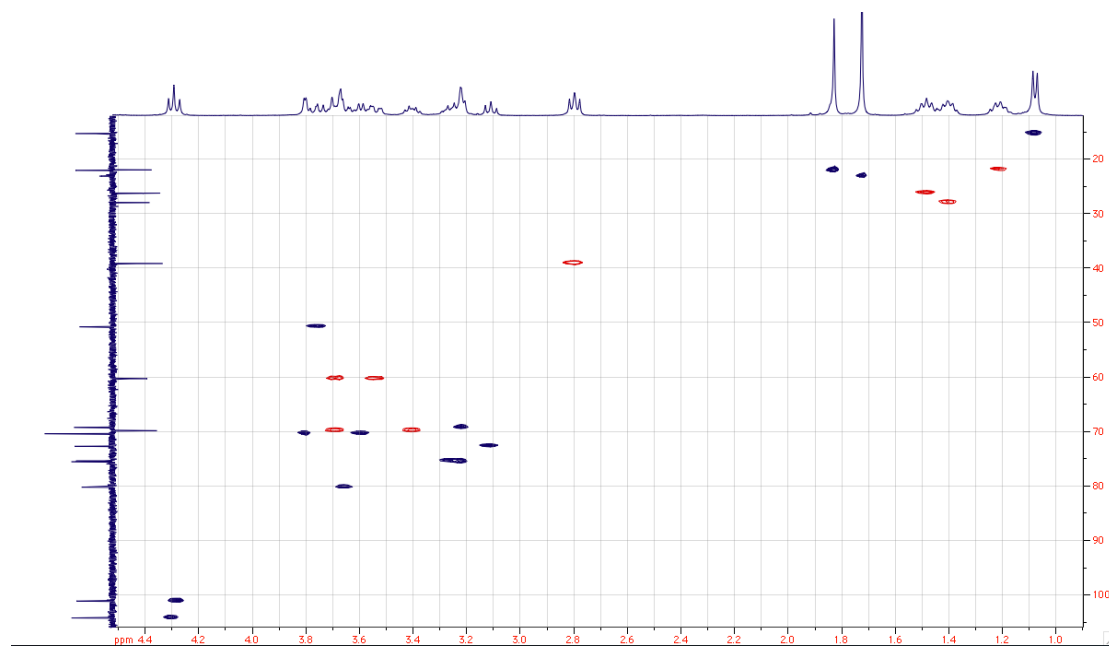

17, coupled HSQC, 400 MHz, D<sub>2</sub>O

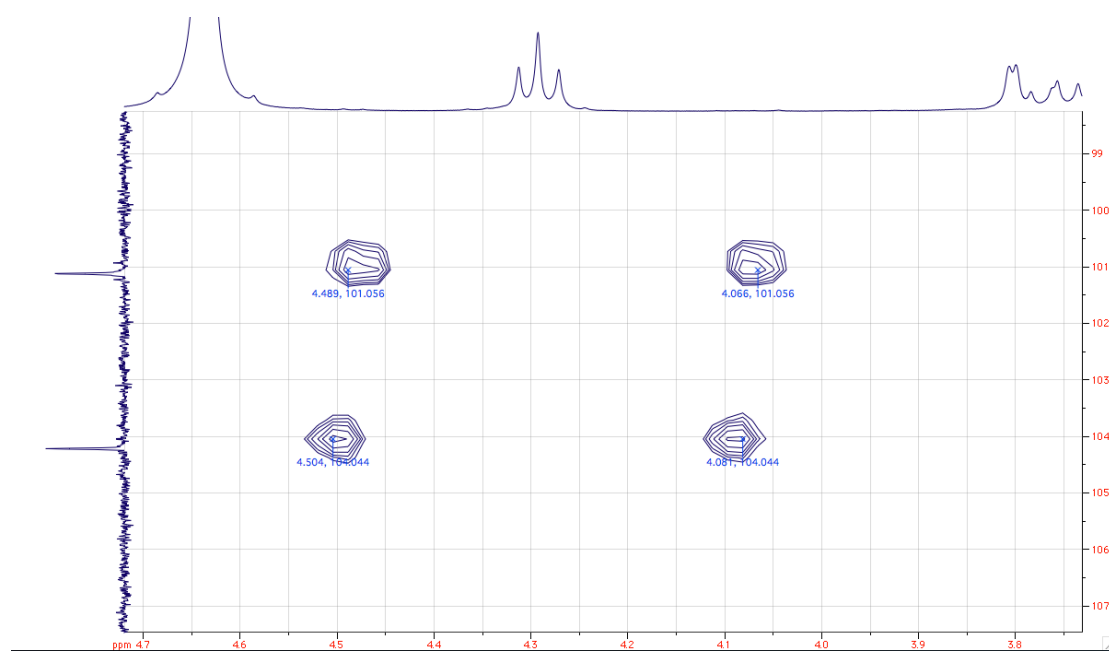

18,  $^1\text{H}$  NMR, 400 MHz,  $\text{CDCl}_3$

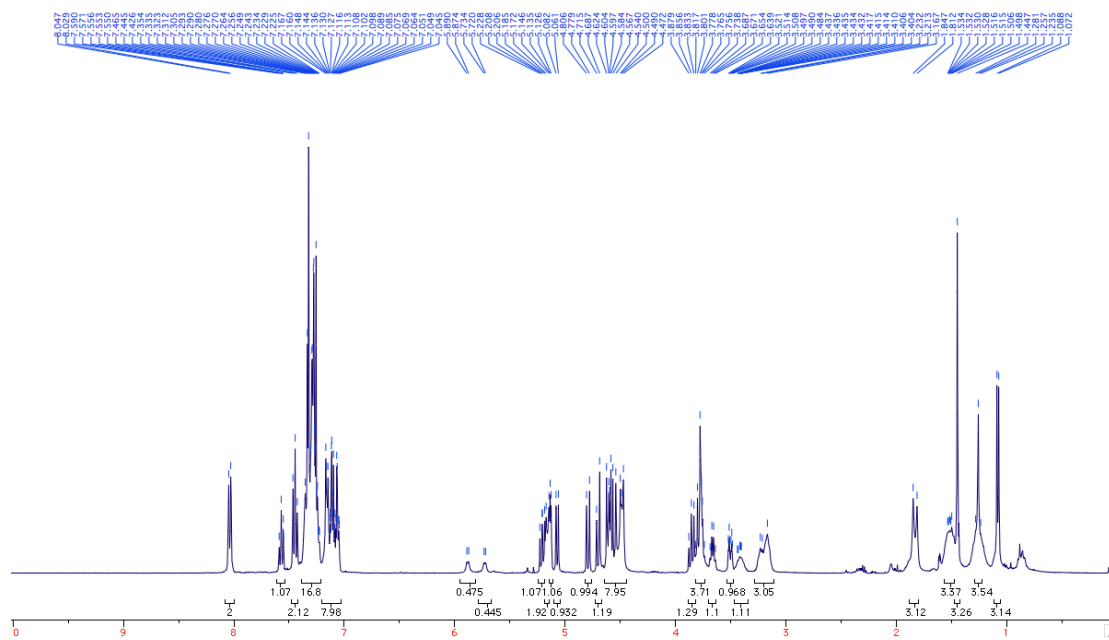

18, COSY, 400 MHz,  $\text{CDCl}_3$

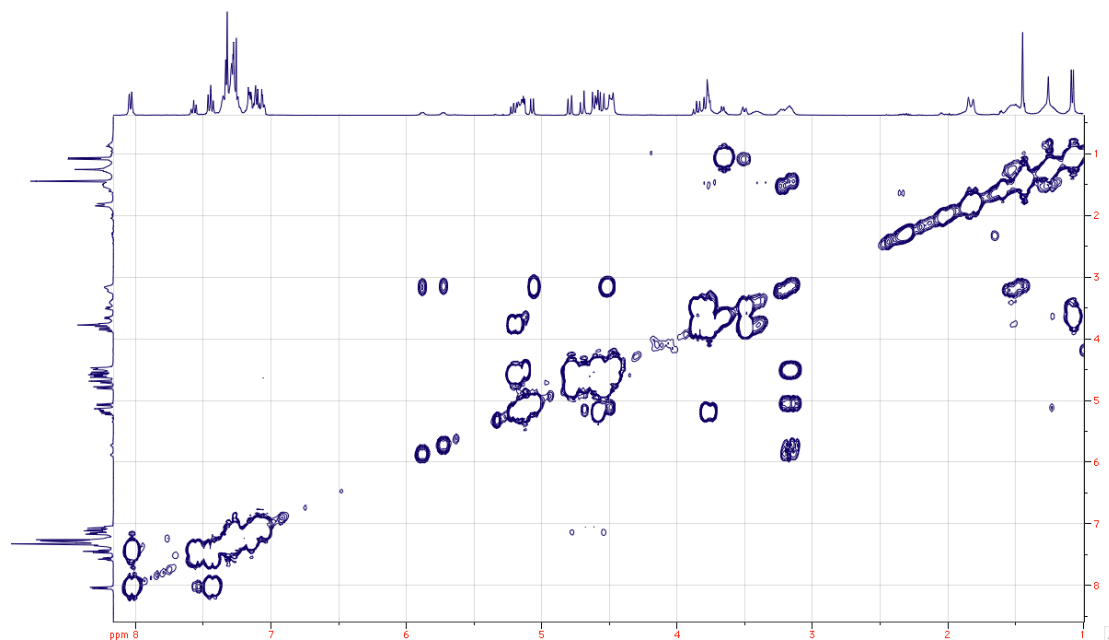



18,  $^{13}\text{C}$  NMR, 400 MHz,  $\text{CDCl}_3$

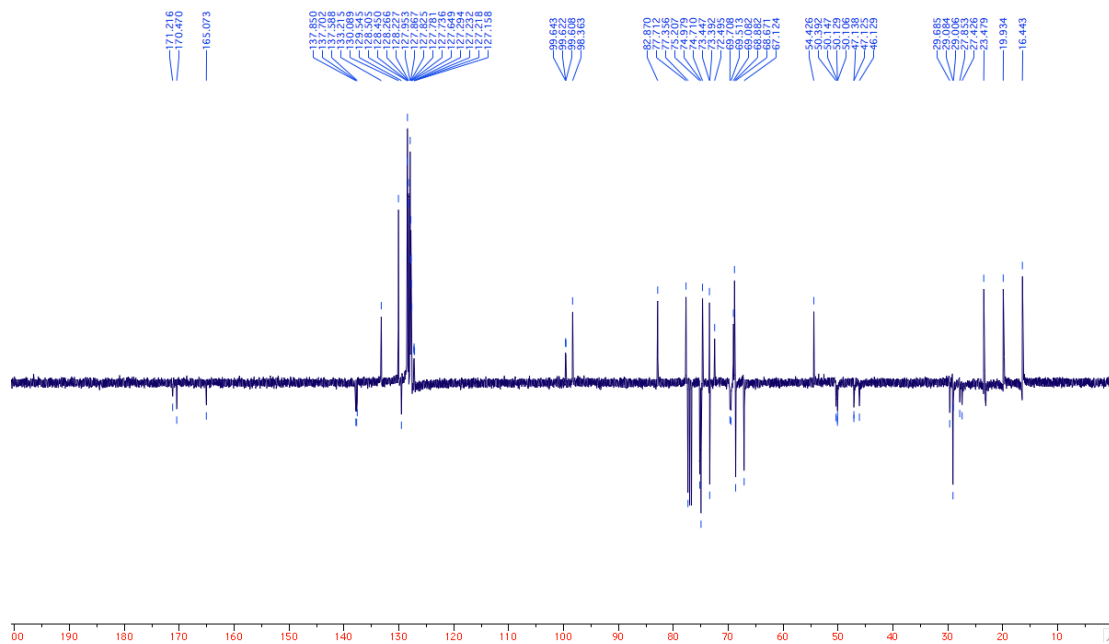

18, HSQC, 400 MHz,  $\text{CDCl}_3$

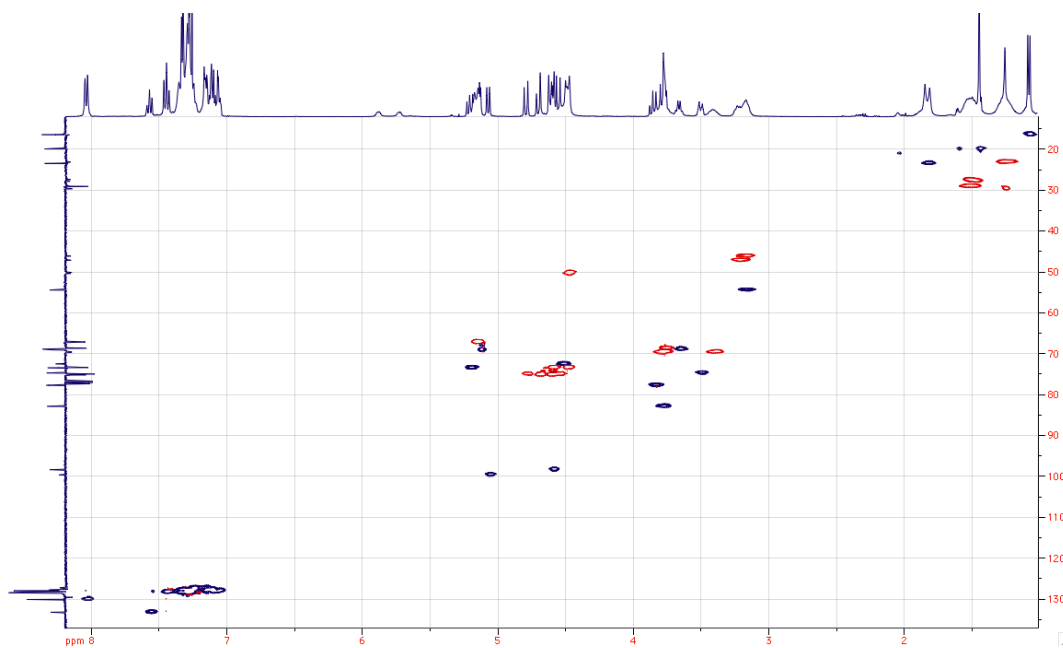

18, decoupled HSQC, 400 MHz, CDCl<sub>3</sub>

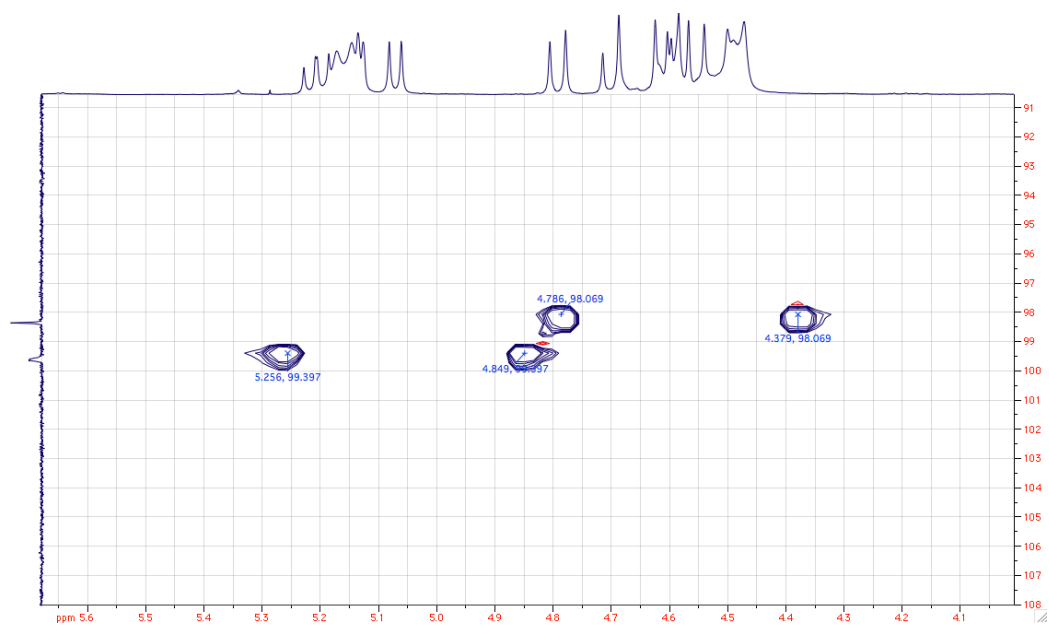

**19,  $^1\text{H}$  NMR, 400 MHz,  $\text{D}_2\text{O}$**

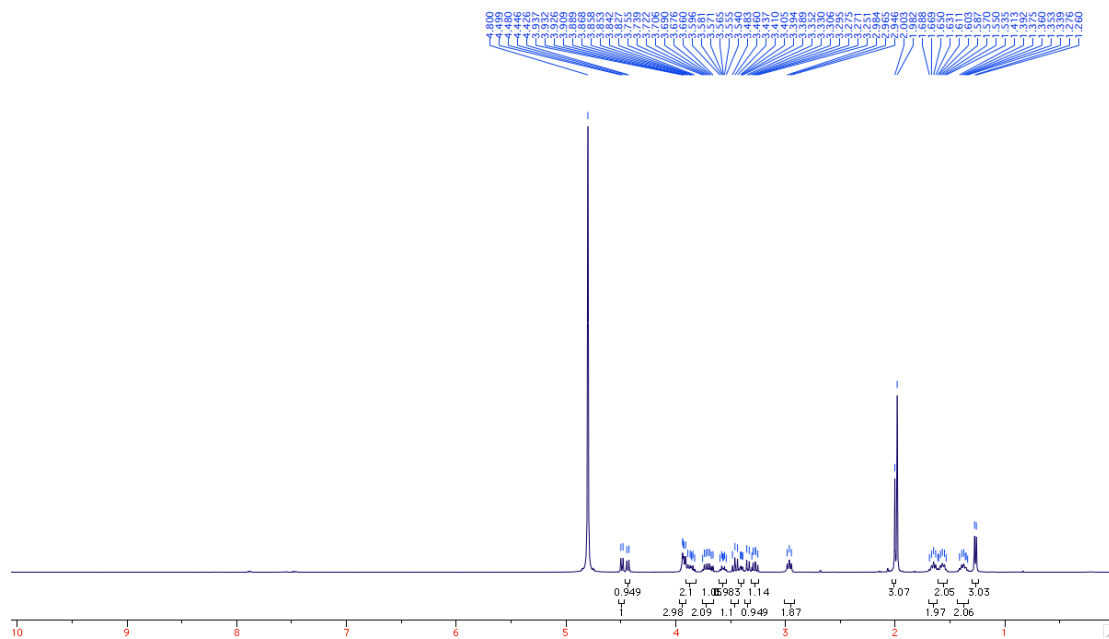

**19, COSY NMR, 400 MHz,  $\text{D}_2\text{O}$**

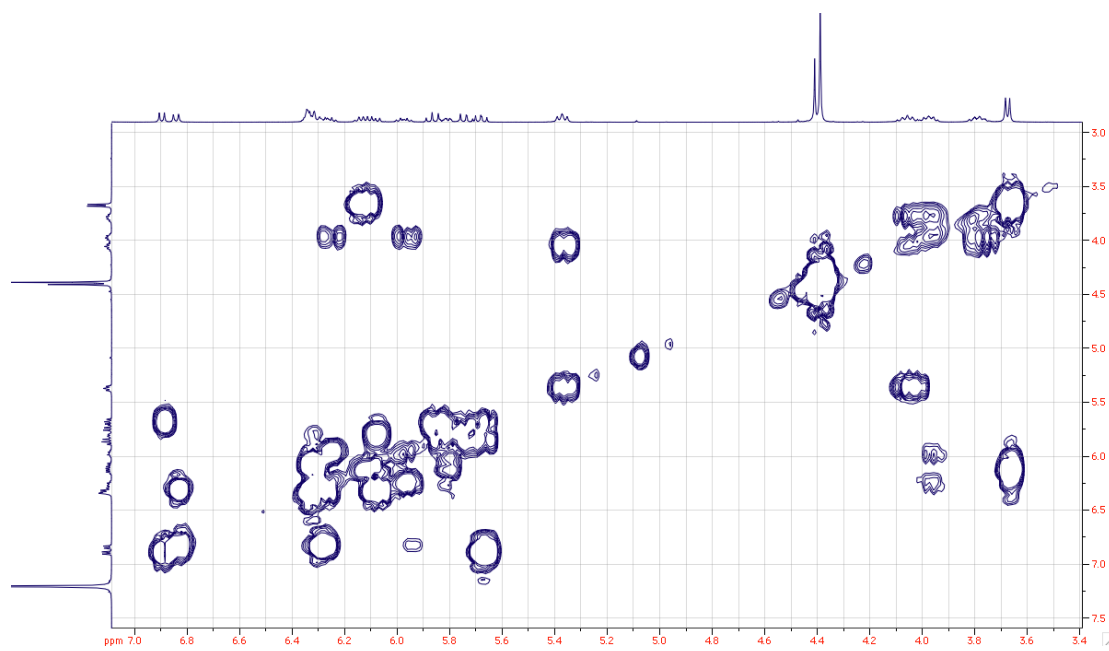

19,  $^{13}\text{C}$  NMR, 100 MHz,  $\text{D}_2\text{O}$

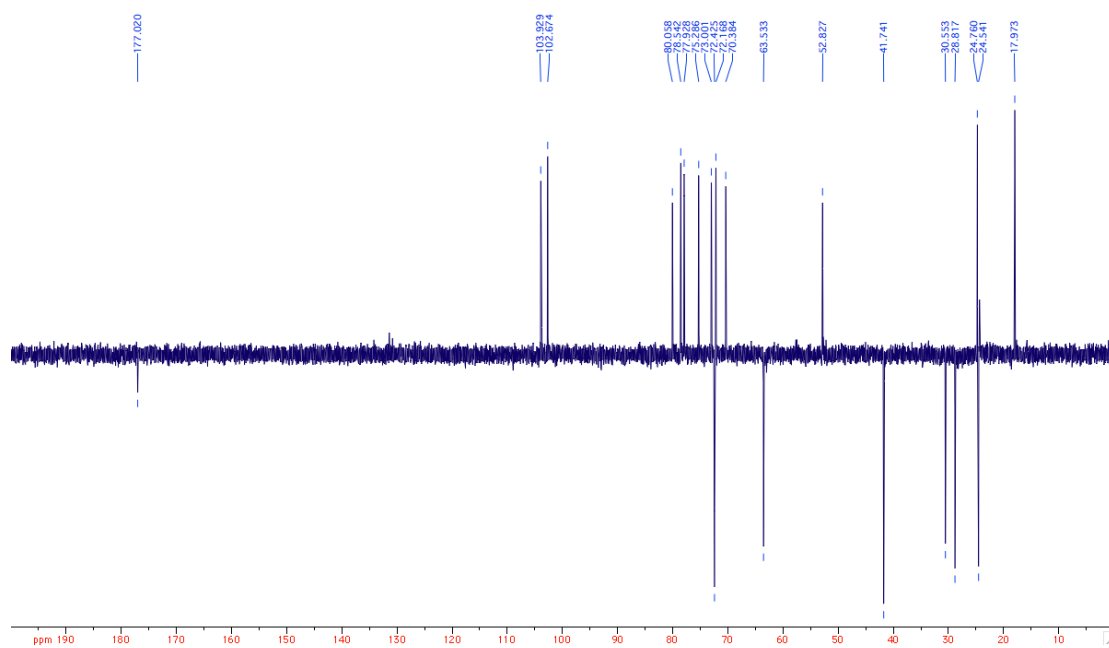

19, HSQC NMR, 400 MHz,  $\text{D}_2\text{O}$

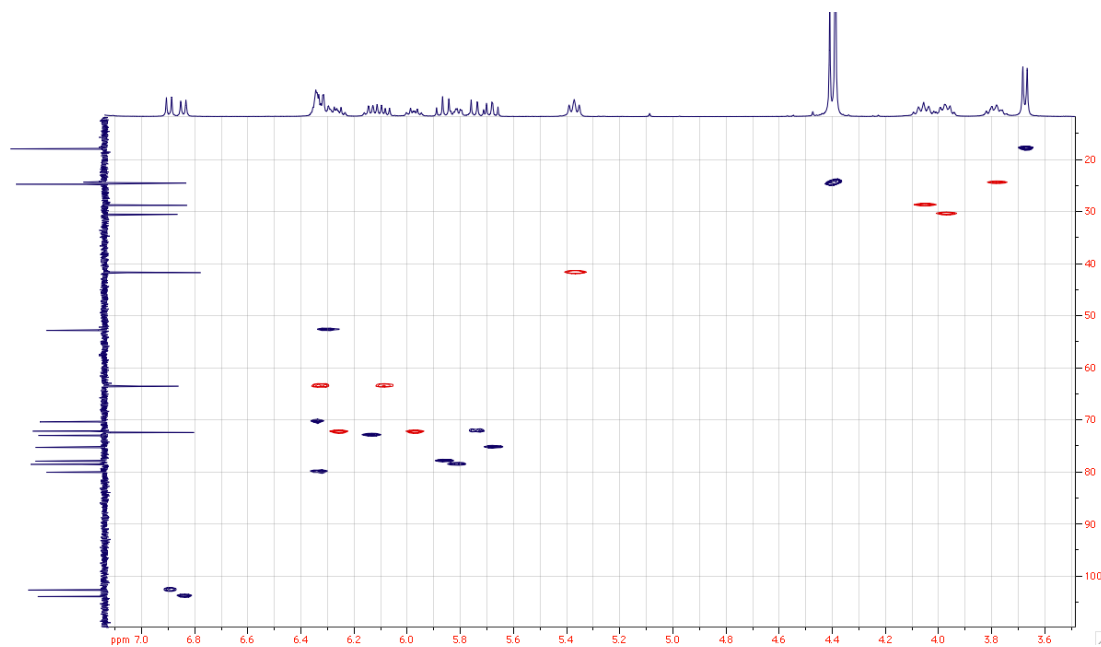

19, coupled HSQC, 400 MHz, D<sub>2</sub>O

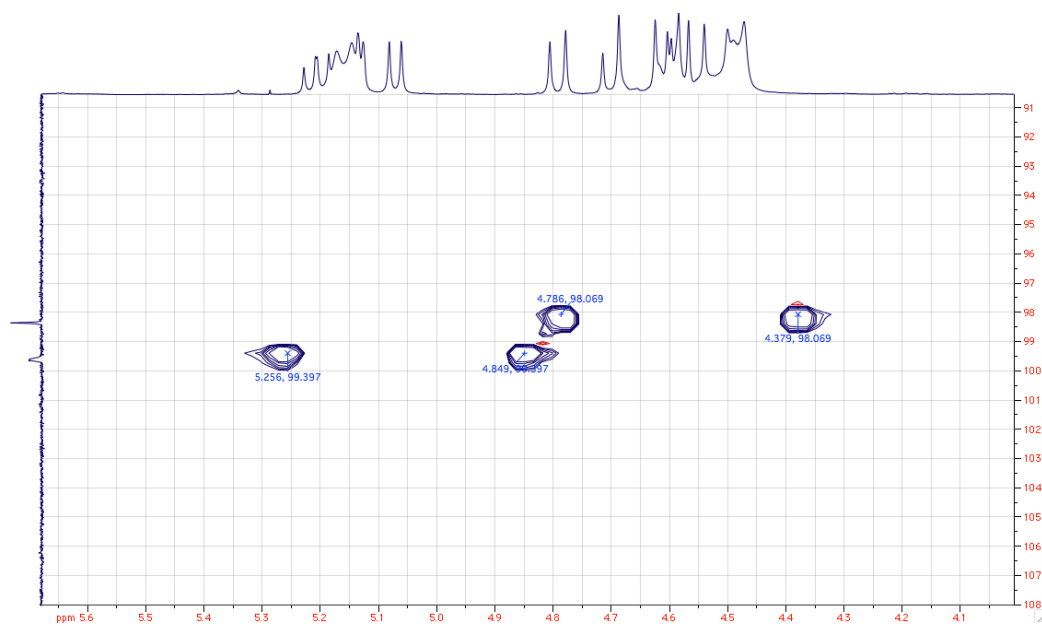

**7a**, NOESY, 400 MHz, CDCl<sub>3</sub>

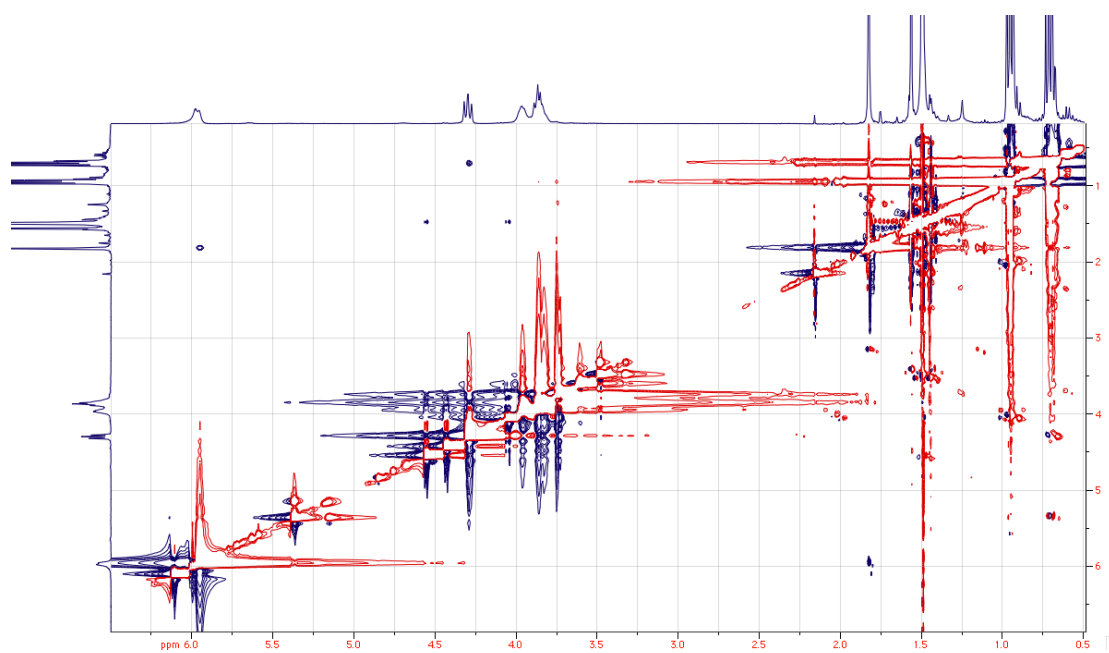

**7b**, NOESY, 400 MHz, CDCl<sub>3</sub>

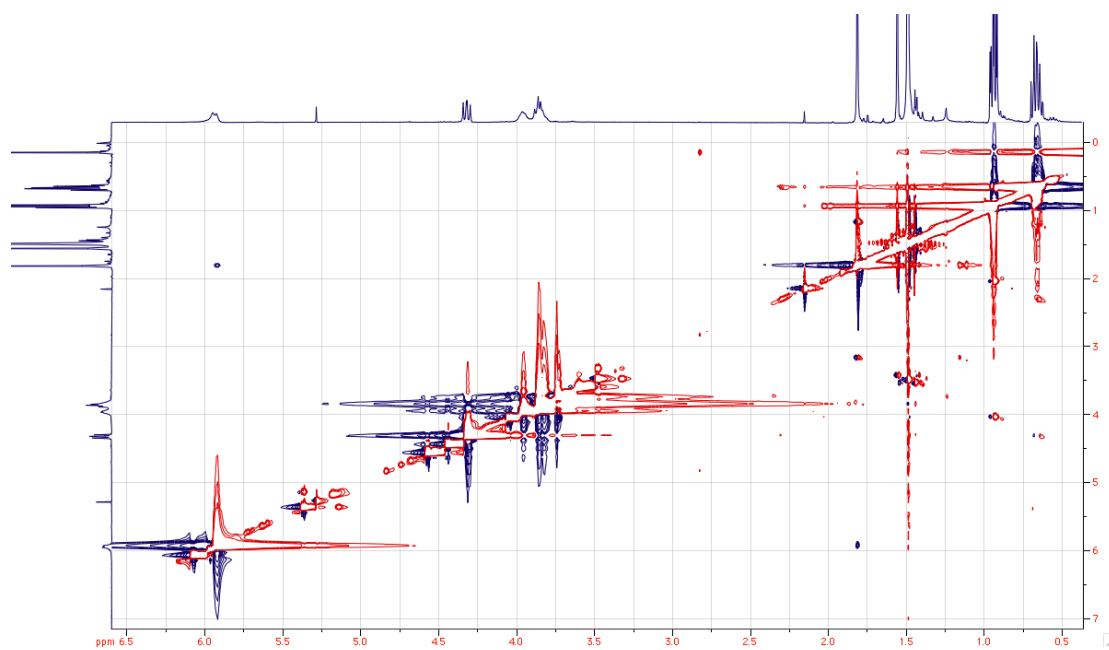

## X-ray structure analysis of D-8b

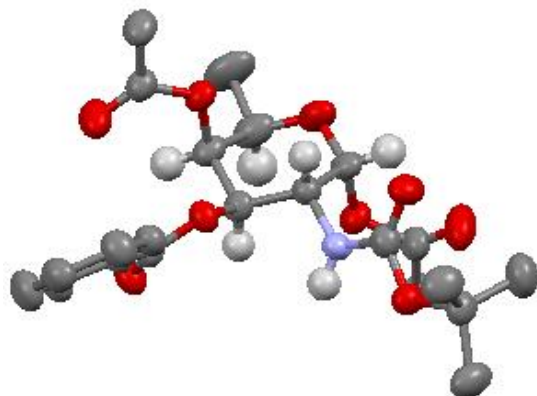

**Table 1:** Crystal data and structure refinement for D-8b.

|                                 |                                                                |                 |
|---------------------------------|----------------------------------------------------------------|-----------------|
| Identification code             | seebdl87                                                       |                 |
| Name                            | D-8b                                                           |                 |
| Empirical formula               | C <sub>44</sub> H <sub>58</sub> N <sub>2</sub> O <sub>18</sub> |                 |
| Formula weight                  | 902.92                                                         |                 |
| Temperature                     | 200(2) K                                                       |                 |
| Wavelength                      | 0.71073 Å                                                      |                 |
| Radiation                       | Mo K                                                           |                 |
| Crystal system                  | Triclinic                                                      |                 |
| Space group                     | P1                                                             |                 |
| Unit cell dimensions            | a = 5.5480(10) Å                                               | α = 90.920(10)° |
|                                 | b = 9.2950(10) Å                                               | β = 92.610(10)° |
|                                 | c = 22.922(2) Å                                                | γ = 92.300(10)° |
| Volume                          | 1179.7(3) Å <sup>3</sup>                                       |                 |
| Z                               | 1                                                              |                 |
| Density (calculated)            | 1.271 g/cm <sup>3</sup>                                        |                 |
| Absorption coefficient          | 0.099 mm <sup>-1</sup>                                         |                 |
| F(000)                          | 480                                                            |                 |
| Crystal description             | needle                                                         |                 |
| Crystal colour                  | colourless                                                     |                 |
| Crystal size                    | 0.6 x 0.04 x 0.02 mm <sup>3</sup>                              |                 |
| No. of reflections (lattice)    | 17860                                                          |                 |
| Theta range (lattice)           | 4.63 to 27.24                                                  |                 |
| Theta range for data collection | 4.62 to 29.27                                                  |                 |
| Index ranges                    | -7 ≤ h ≤ 7, -12 ≤ k ≤ 12, -31 ≤ l ≤ 31                         |                 |
| Reflections collected           | 44527                                                          |                 |
| Independent reflections         | 12145 [R(int) = 0.1299]                                        |                 |

|                                   |                                             |
|-----------------------------------|---------------------------------------------|
| Completeness to theta = 29.27°    | 99.2%                                       |
| Absorption correction             | None                                        |
| Measurement method                | rotation method                             |
| Decay                             | 1%                                          |
| Data collection                   | STOE X-AREA                                 |
| Cell refinement                   | STOE X-AREA                                 |
| Data reduction                    | STOE X-RED                                  |
| Structure solution                | SHELXL-97 (Sheldrick, 2008)                 |
| Structure refinement              | SHELXL-97 (Sheldrick, 2008)                 |
| Molecular graphics                | ORTEP3                                      |
| Publication material              | WINGX                                       |
| Refinement method                 | Full-matrix least-squares on F <sup>2</sup> |
| Weighting scheme                  | calc                                        |
| Solution primary                  | direct                                      |
| Hydrogen treatment                | constr                                      |
| Data / restraints / parameters    | 12145 / 3 / 577                             |
| Goodness-of-fit on F <sup>2</sup> | 0.866                                       |
| Final R indices [I>2sigma(I)]     | R1 = 0.0591, wR2 = 0.1223                   |
| R indices (all data)              | R1 = 0.1474, wR2 = 0.1485                   |
| Absolute structure parameter      | -0.6(10)                                    |
| Largest diff. peak and hole       | 0.178 and -0.208 e.Å <sup>-3</sup>          |



**Table 2:** Atomic coordinates ( $\times 10^4$ ) and equivalent isotropic displacement parameters ( $\text{\AA}^2 \times 10^3$ ) for D-8b.  $U(\text{eq})$  is defined as one third of the trace of the orthogonalized  $U^{ij}$  tensor.

|       | x         | y        | z        | U(eq) |
|-------|-----------|----------|----------|-------|
| C(1)  | 11528(7)  | -98(4)   | 13578(2) | 40(1) |
| C(2)  | 9541(7)   | -264(4)  | 14005(2) | 42(1) |
| C(3)  | 9582(8)   | 1063(4)  | 14423(2) | 47(1) |
| O(1)  | 9512(6)   | 2329(3)  | 14132(1) | 60(1) |
| C(4)  | 11455(10) | 2553(4)  | 13748(2) | 63(1) |
| C(5)  | 11468(7)  | 1371(4)  | 13288(2) | 47(1) |
| C(6)  | 12868(7)  | -1668(4) | 12843(2) | 42(1) |
| C(24) | 5656(6)   | 3588(4)  | 8596(2)  | 37(1) |
| C(7)  | 12080(7)  | -2835(4) | 12413(2) | 40(1) |
| C(12) | 9851(7)   | -3534(4) | 12438(2) | 48(1) |
| C(40) | 7065(7)   | 2501(4)  | 7246(2)  | 47(1) |
| C(11) | 9247(8)   | -4642(5) | 12031(2) | 58(1) |
| C(10) | 10826(8)  | -5047(5) | 11622(2) | 55(1) |
| C(27) | 7724(6)   | 2058(4)  | 9327(2)  | 40(1) |
| C(26) | 7344(8)   | 794(4)   | 8900(2)  | 46(1) |
| O(12) | 11926(4)  | 4595(3)  | 9529(1)  | 53(1) |
| O(4)  | 5796(5)   | -1885(3) | 14507(1) | 57(1) |
| C(28) | 10071(6)  | 5146(4)  | 9634(2)  | 40(1) |
| O(18) | 8031(5)   | 2645(4)  | 10494(1) | 63(1) |
| C(23) | 7859(6)   | 3450(4)  | 9007(2)  | 39(1) |
| C(29) | 9944(7)   | 6415(4)  | 10037(2) | 40(1) |
| O(5)  | 8644(4)   | -3369(3) | 14879(1) | 49(1) |
| C(43) | 6067(7)   | 2385(4)  | 10269(2) | 42(1) |
| C(41) | 9292(8)   | 2299(5)  | 6936(2)  | 61(1) |
| O(9)  | 11305(6)  | 962(4)   | 12118(1) | 68(1) |
| N(2)  | 5837(5)   | 4916(3)  | 8263(1)  | 40(1) |
| C(42) | 6977(10)  | -637(4)  | 9179(2)  | 63(1) |
| C(44) | 3756(7)   | 2448(5)  | 10576(2) | 48(1) |
| C(30) | 8032(8)   | 6634(4)  | 10368(2) | 54(1) |
| C(35) | 3836(7)   | 5518(4)  | 8058(2)  | 40(1) |
| C(21) | 9451(8)   | 1229(4)  | 12342(2) | 46(1) |
| C(13) | 7876(7)   | -2264(4) | 14564(2) | 46(1) |
| C(36) | 2626(7)   | 7591(4)  | 7482(2)  | 45(1) |

|       |           |          |          |       |
|-------|-----------|----------|----------|-------|
| C(38) | 1123(8)   | 8283(4)  | 7941(2)  | 54(1) |
| C(22) | 7079(7)   | 1339(5)  | 12025(2) | 57(1) |
| C(14) | 6958(7)   | -4310(4) | 15190(2) | 47(1) |
| O(3)  | 14925(5)  | -1173(3) | 12916(1) | 53(1) |
| C(25) | 5387(7)   | 2271(4)  | 8193(2)  | 42(1) |
| O(17) | 5660(4)   | 2038(2)  | 9695(1)  | 38(1) |
| O(2)  | 11017(4)  | -1237(3) | 13149(1) | 42(1) |
| N(1)  | 9793(6)   | -1577(3) | 14331(1) | 45(1) |
| O(11) | 7881(4)   | 4677(2)  | 9414(1)  | 37(1) |
| O(6)  | 11743(5)  | 1058(3)  | 14794(1) | 48(1) |
| O(8)  | 9290(4)   | 1443(3)  | 12918(1) | 44(1) |
| O(10) | 5297(5)   | 980(3)   | 8505(1)  | 46(1) |
| O(15) | 7433(4)   | 2234(3)  | 7822(1)  | 41(1) |
| O(14) | 4460(4)   | 6733(2)  | 7760(1)  | 45(1) |
| O(13) | 1775(4)   | 5086(3)  | 8122(1)  | 51(1) |
| O(16) | 5187(5)   | 2873(4)  | 7041(1)  | 69(1) |
| C(39) | 4158(8)   | 8765(5)  | 7191(2)  | 61(1) |
| C(15) | 8634(8)   | -5344(5) | 15488(2) | 69(1) |
| C(34) | 11929(8)  | 7355(5)  | 10082(2) | 64(1) |
| C(31) | 8072(9)   | 7815(5)  | 10758(2) | 64(1) |
| C(32) | 10061(9)  | 8760(5)  | 10788(2) | 70(1) |
| C(8)  | 13645(8)  | -3224(5) | 11987(2) | 56(1) |
| C(9)  | 13002(9)  | -4299(5) | 11594(2) | 65(1) |
| C(16) | 5196(8)   | -5071(5) | 14764(2) | 67(1) |
| C(37) | 1091(9)   | 6730(5)  | 7027(2)  | 65(1) |
| C(17) | 5741(10)  | -3420(6) | 15648(2) | 76(1) |
| C(33) | 11938(9)  | 8548(5)  | 10449(3) | 82(2) |
| C(18) | 11572(8)  | 773(5)   | 15372(2) | 50(1) |
| C(19) | 13915(8)  | 907(5)   | 15683(2) | 63(1) |
| C(20) | 11173(12) | 4040(5)  | 13480(3) | 90(2) |
| O(7)  | 9668(6)   | 410(5)   | 15575(1) | 85(1) |

---

**Table 3:** Bond lengths [Å] and angles [°] for D-8b.

---

|             |          |
|-------------|----------|
| C(1)-O(2)   | 1.443(4) |
| C(1)-C(2)   | 1.513(5) |
| C(1)-C(5)   | 1.529(5) |
| C(1)-H(1)   | 0.9800   |
| C(2)-N(1)   | 1.449(5) |
| C(2)-C(3)   | 1.549(5) |
| C(2)-H(2)   | 0.9800   |
| C(3)-O(1)   | 1.363(5) |
| C(3)-O(6)   | 1.438(4) |
| C(3)-H(3)   | 0.9800   |
| O(1)-C(4)   | 1.433(6) |
| C(4)-C(5)   | 1.512(6) |
| C(4)-C(20)  | 1.533(6) |
| C(4)-H(4)   | 0.9800   |
| C(5)-O(8)   | 1.448(4) |
| C(5)-H(5)   | 0.9800   |
| C(6)-O(3)   | 1.217(4) |
| C(6)-O(2)   | 1.341(4) |
| C(6)-C(7)   | 1.493(5) |
| C(24)-N(2)  | 1.464(5) |
| C(24)-C(25) | 1.519(5) |
| C(24)-C(23) | 1.520(5) |
| C(24)-H(24) | 0.9800   |
| C(7)-C(12)  | 1.377(5) |
| C(7)-C(8)   | 1.388(5) |
| C(12)-C(11) | 1.399(6) |
| C(12)-H(12) | 0.9300   |
| C(40)-O(16) | 1.190(4) |
| C(40)-O(15) | 1.355(4) |
| C(40)-C(41) | 1.470(6) |
| C(11)-C(10) | 1.370(6) |
| C(11)-H(11) | 0.9300   |
| C(10)-C(9)  | 1.373(6) |
| C(10)-H(10) | 0.9300   |
| C(27)-O(17) | 1.452(4) |
| C(27)-C(23) | 1.500(5) |

|              |          |
|--------------|----------|
| C(27)-C(26)  | 1.520(5) |
| C(27)-H(27)  | 0.9800   |
| C(26)-O(10)  | 1.437(4) |
| C(26)-C(42)  | 1.496(6) |
| C(26)-H(26)  | 0.9800   |
| O(12)-C(28)  | 1.200(4) |
| O(4)-C(13)   | 1.222(5) |
| C(28)-O(11)  | 1.347(4) |
| C(28)-C(29)  | 1.493(5) |
| O(18)-C(43)  | 1.198(4) |
| C(23)-O(11)  | 1.461(4) |
| C(23)-H(23)  | 0.9800   |
| C(29)-C(30)  | 1.352(6) |
| C(29)-C(34)  | 1.377(5) |
| O(5)-C(13)   | 1.337(5) |
| O(5)-C(14)   | 1.471(4) |
| C(43)-O(17)  | 1.357(4) |
| C(43)-C(44)  | 1.492(5) |
| C(41)-H(41A) | 0.9600   |
| C(41)-H(41B) | 0.9600   |
| C(41)-H(41C) | 0.9600   |
| O(9)-C(21)   | 1.203(5) |
| N(2)-C(35)   | 1.333(4) |
| N(2)-H(2A)   | 0.8600   |
| C(42)-H(42A) | 0.9600   |
| C(42)-H(42B) | 0.9600   |
| C(42)-H(42C) | 0.9600   |
| C(44)-H(44A) | 0.9600   |
| C(44)-H(44B) | 0.9600   |
| C(44)-H(44C) | 0.9600   |
| C(30)-C(31)  | 1.403(6) |
| C(30)-H(30)  | 0.9300   |
| C(35)-O(13)  | 1.213(4) |
| C(35)-O(14)  | 1.369(4) |
| C(21)-O(8)   | 1.341(5) |
| C(21)-C(22)  | 1.482(5) |
| C(13)-N(1)   | 1.354(5) |
| C(36)-O(14)  | 1.450(4) |

|              |          |
|--------------|----------|
| C(36)-C(37)  | 1.514(5) |
| C(36)-C(38)  | 1.522(6) |
| C(36)-C(39)  | 1.535(6) |
| C(38)-H(38A) | 0.9600   |
| C(38)-H(38B) | 0.9600   |
| C(38)-H(38C) | 0.9600   |
| C(22)-H(22A) | 0.9600   |
| C(22)-H(22B) | 0.9600   |
| C(22)-H(22C) | 0.9600   |
| C(14)-C(16)  | 1.497(5) |
| C(14)-C(15)  | 1.513(6) |
| C(14)-C(17)  | 1.525(6) |
| C(25)-O(10)  | 1.407(4) |
| C(25)-O(15)  | 1.450(4) |
| C(25)-H(25)  | 0.9800   |
| N(1)-H(1A)   | 0.8600   |
| O(6)-C(18)   | 1.363(5) |
| C(39)-H(39A) | 0.9600   |
| C(39)-H(39B) | 0.9600   |
| C(39)-H(39C) | 0.9600   |
| C(15)-H(15A) | 0.9600   |
| C(15)-H(15B) | 0.9600   |
| C(15)-H(15C) | 0.9600   |
| C(34)-C(33)  | 1.380(7) |
| C(34)-H(34)  | 0.9300   |
| C(31)-C(32)  | 1.381(7) |
| C(31)-H(31)  | 0.9300   |
| C(32)-C(33)  | 1.347(7) |
| C(32)-H(32)  | 0.9300   |
| C(8)-C(9)    | 1.360(6) |
| C(8)-H(8)    | 0.9300   |
| C(9)-H(9)    | 0.9300   |
| C(16)-H(16A) | 0.9600   |
| C(16)-H(16B) | 0.9600   |
| C(16)-H(16C) | 0.9600   |
| C(37)-H(37A) | 0.9600   |
| C(37)-H(37B) | 0.9600   |
| C(37)-H(37C) | 0.9600   |

|                 |          |
|-----------------|----------|
| C(17)-H(17A)    | 0.9600   |
| C(17)-H(17B)    | 0.9600   |
| C(17)-H(17C)    | 0.9600   |
| C(33)-H(33)     | 0.9300   |
| C(18)-O(7)      | 1.211(5) |
| C(18)-C(19)     | 1.453(6) |
| C(19)-H(19A)    | 0.9600   |
| C(19)-H(19B)    | 0.9600   |
| C(19)-H(19C)    | 0.9600   |
| C(20)-H(20A)    | 0.9600   |
| C(20)-H(20B)    | 0.9600   |
| C(20)-H(20C)    | 0.9600   |
| O(2)-C(1)-C(2)  | 104.8(3) |
| O(2)-C(1)-C(5)  | 110.4(3) |
| C(2)-C(1)-C(5)  | 110.8(3) |
| O(2)-C(1)-H(1)  | 110.3    |
| C(2)-C(1)-H(1)  | 110.3    |
| C(5)-C(1)-H(1)  | 110.3    |
| N(1)-C(2)-C(1)  | 110.4(3) |
| N(1)-C(2)-C(3)  | 110.8(3) |
| C(1)-C(2)-C(3)  | 110.2(3) |
| N(1)-C(2)-H(2)  | 108.5    |
| C(1)-C(2)-H(2)  | 108.5    |
| C(3)-C(2)-H(2)  | 108.5    |
| O(1)-C(3)-O(6)  | 109.5(3) |
| O(1)-C(3)-C(2)  | 112.5(3) |
| O(6)-C(3)-C(2)  | 108.5(3) |
| O(1)-C(3)-H(3)  | 108.7    |
| O(6)-C(3)-H(3)  | 108.7    |
| C(2)-C(3)-H(3)  | 108.7    |
| C(3)-O(1)-C(4)  | 113.8(3) |
| O(1)-C(4)-C(5)  | 111.6(4) |
| O(1)-C(4)-C(20) | 107.2(4) |
| C(5)-C(4)-C(20) | 112.1(4) |
| O(1)-C(4)-H(4)  | 108.7    |
| C(5)-C(4)-H(4)  | 108.7    |
| C(20)-C(4)-H(4) | 108.7    |

|                   |          |
|-------------------|----------|
| O(8)-C(5)-C(4)    | 108.3(3) |
| O(8)-C(5)-C(1)    | 109.6(3) |
| C(4)-C(5)-C(1)    | 110.0(3) |
| O(8)-C(5)-H(5)    | 109.7    |
| C(4)-C(5)-H(5)    | 109.7    |
| C(1)-C(5)-H(5)    | 109.7    |
| O(3)-C(6)-O(2)    | 123.7(3) |
| O(3)-C(6)-C(7)    | 124.9(4) |
| O(2)-C(6)-C(7)    | 111.4(3) |
| N(2)-C(24)-C(25)  | 111.3(3) |
| N(2)-C(24)-C(23)  | 110.9(3) |
| C(25)-C(24)-C(23) | 109.3(3) |
| N(2)-C(24)-H(24)  | 108.4    |
| C(25)-C(24)-H(24) | 108.4    |
| C(23)-C(24)-H(24) | 108.4    |
| C(12)-C(7)-C(8)   | 120.1(4) |
| C(12)-C(7)-C(6)   | 121.0(3) |
| C(8)-C(7)-C(6)    | 118.9(3) |
| C(7)-C(12)-C(11)  | 118.1(4) |
| C(7)-C(12)-H(12)  | 120.9    |
| C(11)-C(12)-H(12) | 120.9    |
| O(16)-C(40)-O(15) | 122.8(4) |
| O(16)-C(40)-C(41) | 126.8(4) |
| O(15)-C(40)-C(41) | 110.4(3) |
| C(10)-C(11)-C(12) | 121.5(4) |
| C(10)-C(11)-H(11) | 119.3    |
| C(12)-C(11)-H(11) | 119.3    |
| C(11)-C(10)-C(9)  | 119.1(4) |
| C(11)-C(10)-H(10) | 120.5    |
| C(9)-C(10)-H(10)  | 120.5    |
| O(17)-C(27)-C(23) | 109.5(3) |
| O(17)-C(27)-C(26) | 107.0(3) |
| C(23)-C(27)-C(26) | 110.5(3) |
| O(17)-C(27)-H(27) | 109.9    |
| C(23)-C(27)-H(27) | 109.9    |
| C(26)-C(27)-H(27) | 109.9    |
| O(10)-C(26)-C(42) | 107.1(3) |
| O(10)-C(26)-C(27) | 111.4(3) |

|                     |          |
|---------------------|----------|
| C(42)-C(26)-C(27)   | 114.6(3) |
| O(10)-C(26)-H(26)   | 107.8    |
| C(42)-C(26)-H(26)   | 107.8    |
| C(27)-C(26)-H(26)   | 107.8    |
| O(12)-C(28)-O(11)   | 124.1(3) |
| O(12)-C(28)-C(29)   | 123.2(3) |
| O(11)-C(28)-C(29)   | 112.6(3) |
| O(11)-C(23)-C(27)   | 110.8(3) |
| O(11)-C(23)-C(24)   | 106.4(3) |
| C(27)-C(23)-C(24)   | 110.9(3) |
| O(11)-C(23)-H(23)   | 109.6    |
| C(27)-C(23)-H(23)   | 109.6    |
| C(24)-C(23)-H(23)   | 109.6    |
| C(30)-C(29)-C(34)   | 119.9(4) |
| C(30)-C(29)-C(28)   | 122.9(3) |
| C(34)-C(29)-C(28)   | 117.1(4) |
| C(13)-O(5)-C(14)    | 121.6(3) |
| O(18)-C(43)-O(17)   | 124.0(4) |
| O(18)-C(43)-C(44)   | 124.7(4) |
| O(17)-C(43)-C(44)   | 111.3(3) |
| C(40)-C(41)-H(41A)  | 109.5    |
| C(40)-C(41)-H(41B)  | 109.5    |
| H(41A)-C(41)-H(41B) | 109.5    |
| C(40)-C(41)-H(41C)  | 109.5    |
| H(41A)-C(41)-H(41C) | 109.5    |
| H(41B)-C(41)-H(41C) | 109.5    |
| C(35)-N(2)-C(24)    | 119.8(3) |
| C(35)-N(2)-H(2A)    | 120.1    |
| C(24)-N(2)-H(2A)    | 120.1    |
| C(26)-C(42)-H(42A)  | 109.5    |
| C(26)-C(42)-H(42B)  | 109.5    |
| H(42A)-C(42)-H(42B) | 109.5    |
| C(26)-C(42)-H(42C)  | 109.5    |
| H(42A)-C(42)-H(42C) | 109.5    |
| H(42B)-C(42)-H(42C) | 109.5    |
| C(43)-C(44)-H(44A)  | 109.5    |
| C(43)-C(44)-H(44B)  | 109.5    |
| H(44A)-C(44)-H(44B) | 109.5    |



|                     |          |
|---------------------|----------|
| C(43)-C(44)-H(44C)  | 109.5    |
| H(44A)-C(44)-H(44C) | 109.5    |
| H(44B)-C(44)-H(44C) | 109.5    |
| C(29)-C(30)-C(31)   | 120.1(4) |
| C(29)-C(30)-H(30)   | 120.0    |
| C(31)-C(30)-H(30)   | 120.0    |
| O(13)-C(35)-N(2)    | 126.5(3) |
| O(13)-C(35)-O(14)   | 124.4(3) |
| N(2)-C(35)-O(14)    | 109.1(3) |
| O(9)-C(21)-O(8)     | 123.3(4) |
| O(9)-C(21)-C(22)    | 125.0(4) |
| O(8)-C(21)-C(22)    | 111.7(4) |
| O(4)-C(13)-O(5)     | 126.3(4) |
| O(4)-C(13)-N(1)     | 124.4(4) |
| O(5)-C(13)-N(1)     | 109.2(3) |
| O(14)-C(36)-C(37)   | 112.0(3) |
| O(14)-C(36)-C(38)   | 110.2(3) |
| C(37)-C(36)-C(38)   | 112.5(3) |
| O(14)-C(36)-C(39)   | 102.0(3) |
| C(37)-C(36)-C(39)   | 110.5(4) |
| C(38)-C(36)-C(39)   | 109.2(3) |
| C(36)-C(38)-H(38A)  | 109.5    |
| C(36)-C(38)-H(38B)  | 109.5    |
| H(38A)-C(38)-H(38B) | 109.5    |
| C(36)-C(38)-H(38C)  | 109.5    |
| H(38A)-C(38)-H(38C) | 109.5    |
| H(38B)-C(38)-H(38C) | 109.5    |
| C(21)-C(22)-H(22A)  | 109.5    |
| C(21)-C(22)-H(22B)  | 109.5    |
| H(22A)-C(22)-H(22B) | 109.5    |
| C(21)-C(22)-H(22C)  | 109.5    |
| H(22A)-C(22)-H(22C) | 109.5    |
| H(22B)-C(22)-H(22C) | 109.5    |
| O(5)-C(14)-C(16)    | 110.2(3) |
| O(5)-C(14)-C(15)    | 102.3(3) |
| C(16)-C(14)-C(15)   | 111.8(4) |
| O(5)-C(14)-C(17)    | 109.2(3) |
| C(16)-C(14)-C(17)   | 113.1(4) |

|                     |          |
|---------------------|----------|
| C(15)-C(14)-C(17)   | 109.7(4) |
| O(10)-C(25)-O(15)   | 107.8(3) |
| O(10)-C(25)-C(24)   | 112.1(3) |
| O(15)-C(25)-C(24)   | 109.6(3) |
| O(10)-C(25)-H(25)   | 109.1    |
| O(15)-C(25)-H(25)   | 109.1    |
| C(24)-C(25)-H(25)   | 109.1    |
| C(43)-O(17)-C(27)   | 117.7(3) |
| C(6)-O(2)-C(1)      | 117.1(3) |
| C(13)-N(1)-C(2)     | 121.8(3) |
| C(13)-N(1)-H(1A)    | 119.1    |
| C(2)-N(1)-H(1A)     | 119.1    |
| C(28)-O(11)-C(23)   | 115.9(3) |
| C(18)-O(6)-C(3)     | 119.4(3) |
| C(21)-O(8)-C(5)     | 118.2(3) |
| C(25)-O(10)-C(26)   | 114.5(3) |
| C(40)-O(15)-C(25)   | 118.4(3) |
| C(35)-O(14)-C(36)   | 120.8(3) |
| C(36)-C(39)-H(39A)  | 109.5    |
| C(36)-C(39)-H(39B)  | 109.5    |
| H(39A)-C(39)-H(39B) | 109.5    |
| C(36)-C(39)-H(39C)  | 109.5    |
| H(39A)-C(39)-H(39C) | 109.5    |
| H(39B)-C(39)-H(39C) | 109.5    |
| C(14)-C(15)-H(15A)  | 109.5    |
| C(14)-C(15)-H(15B)  | 109.5    |
| H(15A)-C(15)-H(15B) | 109.5    |
| C(14)-C(15)-H(15C)  | 109.5    |
| H(15A)-C(15)-H(15C) | 109.5    |
| H(15B)-C(15)-H(15C) | 109.5    |
| C(29)-C(34)-C(33)   | 120.2(5) |
| C(29)-C(34)-H(34)   | 119.9    |
| C(33)-C(34)-H(34)   | 119.9    |
| C(32)-C(31)-C(30)   | 119.1(5) |
| C(32)-C(31)-H(31)   | 120.5    |
| C(30)-C(31)-H(31)   | 120.5    |
| C(33)-C(32)-C(31)   | 120.4(5) |
| C(33)-C(32)-H(32)   | 119.8    |

|                     |          |
|---------------------|----------|
| C(31)-C(32)-H(32)   | 119.8    |
| C(9)-C(8)-C(7)      | 120.5(4) |
| C(9)-C(8)-H(8)      | 119.7    |
| C(7)-C(8)-H(8)      | 119.7    |
| C(8)-C(9)-C(10)     | 120.6(4) |
| C(8)-C(9)-H(9)      | 119.7    |
| C(10)-C(9)-H(9)     | 119.7    |
| C(14)-C(16)-H(16A)  | 109.5    |
| C(14)-C(16)-H(16B)  | 109.5    |
| H(16A)-C(16)-H(16B) | 109.5    |
| C(14)-C(16)-H(16C)  | 109.5    |
| H(16A)-C(16)-H(16C) | 109.5    |
| H(16B)-C(16)-H(16C) | 109.5    |
| C(36)-C(37)-H(37A)  | 109.5    |
| C(36)-C(37)-H(37B)  | 109.5    |
| H(37A)-C(37)-H(37B) | 109.5    |
| C(36)-C(37)-H(37C)  | 109.5    |
| H(37A)-C(37)-H(37C) | 109.5    |
| H(37B)-C(37)-H(37C) | 109.5    |
| C(14)-C(17)-H(17A)  | 109.5    |
| C(14)-C(17)-H(17B)  | 109.5    |
| H(17A)-C(17)-H(17B) | 109.5    |
| C(14)-C(17)-H(17C)  | 109.5    |
| H(17A)-C(17)-H(17C) | 109.5    |
| H(17B)-C(17)-H(17C) | 109.5    |
| C(32)-C(33)-C(34)   | 120.3(4) |
| C(32)-C(33)-H(33)   | 119.9    |
| C(34)-C(33)-H(33)   | 119.9    |
| O(7)-C(18)-O(6)     | 121.7(4) |
| O(7)-C(18)-C(19)    | 126.7(4) |
| O(6)-C(18)-C(19)    | 111.6(4) |
| C(18)-C(19)-H(19A)  | 109.5    |
| C(18)-C(19)-H(19B)  | 109.5    |
| H(19A)-C(19)-H(19B) | 109.5    |
| C(18)-C(19)-H(19C)  | 109.5    |
| H(19A)-C(19)-H(19C) | 109.5    |
| H(19B)-C(19)-H(19C) | 109.5    |
| C(4)-C(20)-H(20A)   | 109.5    |

|                     |       |
|---------------------|-------|
| C(4)-C(20)-H(20B)   | 109.5 |
| H(20A)-C(20)-H(20B) | 109.5 |
| C(4)-C(20)-H(20C)   | 109.5 |
| H(20A)-C(20)-H(20C) | 109.5 |
| H(20B)-C(20)-H(20C) | 109.5 |

---

Symmetry transformations used to generate equivalent atoms:

**Table 4:** Anisotropic displacement parameters ( $\text{\AA}^2 \times 10^3$ ) for D-8b. The anisotropic displacement factor exponent takes the form:  $-2p^2[ h^2a^*2U^{11} + \dots + 2 h k a^* b^* U^{12} ]$

|       | U <sup>11</sup> | U <sup>22</sup> | U <sup>33</sup> | U <sup>23</sup> | U <sup>13</sup> | U <sup>12</sup> |
|-------|-----------------|-----------------|-----------------|-----------------|-----------------|-----------------|
| C(1)  | 48(2)           | 38(2)           | 35(2)           | -7(2)           | -2(2)           | -3(2)           |
| C(2)  | 41(2)           | 42(2)           | 41(2)           | 2(2)            | 0(2)            | 3(2)            |
| C(3)  | 55(2)           | 51(2)           | 36(2)           | -1(2)           | -9(2)           | 10(2)           |
| O(1)  | 83(2)           | 44(2)           | 51(2)           | 0(1)            | -9(2)           | 14(2)           |
| C(4)  | 85(3)           | 46(3)           | 56(3)           | -1(2)           | -21(3)          | -2(2)           |
| C(5)  | 49(2)           | 48(2)           | 42(2)           | 5(2)            | -12(2)          | -6(2)           |
| C(6)  | 41(2)           | 50(2)           | 35(2)           | 2(2)            | 0(2)            | -1(2)           |
| C(24) | 34(2)           | 41(2)           | 35(2)           | 1(2)            | 1(2)            | -2(2)           |
| C(7)  | 38(2)           | 43(2)           | 40(2)           | -3(2)           | 1(2)            | 1(2)            |
| C(12) | 49(2)           | 46(2)           | 49(2)           | -3(2)           | 5(2)            | 7(2)            |
| C(40) | 40(2)           | 59(3)           | 40(2)           | 7(2)            | -5(2)           | 0(2)            |
| C(11) | 53(3)           | 56(3)           | 63(3)           | -11(2)          | 1(2)            | -6(2)           |
| C(10) | 63(3)           | 53(2)           | 49(2)           | -11(2)          | -3(2)           | 8(2)            |
| C(27) | 37(2)           | 44(2)           | 41(2)           | -3(2)           | 8(2)            | 6(2)            |
| C(26) | 60(3)           | 39(2)           | 38(2)           | -1(2)           | 0(2)            | 6(2)            |
| O(12) | 28(1)           | 77(2)           | 53(2)           | -14(1)          | 1(1)            | 7(1)            |
| O(4)  | 39(2)           | 65(2)           | 66(2)           | 11(2)           | -1(1)           | 6(1)            |
| C(28) | 32(2)           | 46(2)           | 42(2)           | 5(2)            | 0(2)            | -4(2)           |
| O(18) | 40(2)           | 106(2)          | 41(2)           | -11(2)          | -4(1)           | -4(2)           |
| C(23) | 32(2)           | 44(2)           | 42(2)           | -4(2)           | 2(2)            | 2(2)            |
| C(29) | 40(2)           | 39(2)           | 40(2)           | -4(2)           | 0(2)            | 4(2)            |
| O(5)  | 42(2)           | 51(2)           | 53(2)           | 9(1)            | 1(1)            | -3(1)           |
| C(43) | 41(2)           | 42(2)           | 41(2)           | 1(2)            | 1(2)            | 1(2)            |
| C(41) | 65(3)           | 82(3)           | 38(2)           | 2(2)            | 8(2)            | 18(2)           |
| O(9)  | 50(2)           | 108(3)          | 46(2)           | -1(2)           | -3(2)           | 4(2)            |
| N(2)  | 33(2)           | 40(2)           | 47(2)           | 6(1)            | 1(1)            | -2(1)           |
| C(42) | 95(4)           | 38(2)           | 55(3)           | 1(2)            | 2(2)            | 6(2)            |
| C(44) | 45(2)           | 61(3)           | 39(2)           | -3(2)           | 9(2)            | 6(2)            |
| C(30) | 54(3)           | 50(2)           | 59(3)           | -5(2)           | 5(2)            | -4(2)           |
| C(35) | 38(2)           | 42(2)           | 38(2)           | 3(2)            | -1(2)           | -1(2)           |
| C(21) | 48(2)           | 49(2)           | 40(2)           | 2(2)            | -4(2)           | -5(2)           |
| C(13) | 45(2)           | 48(2)           | 44(2)           | -5(2)           | 1(2)            | -4(2)           |
| C(36) | 45(2)           | 42(2)           | 47(2)           | 3(2)            | -4(2)           | 6(2)            |

|       |        |        |        |        |        |        |
|-------|--------|--------|--------|--------|--------|--------|
| C(38) | 57(3)  | 43(2)  | 62(3)  | -6(2)  | 4(2)   | 9(2)   |
| C(22) | 49(2)  | 75(3)  | 46(2)  | 2(2)   | -7(2)  | -6(2)  |
| C(14) | 44(2)  | 49(2)  | 47(2)  | 3(2)   | 3(2)   | -10(2) |
| O(3)  | 40(2)  | 62(2)  | 55(2)  | -11(1) | 5(1)   | -2(1)  |
| C(25) | 41(2)  | 43(2)  | 43(2)  | 1(2)   | 4(2)   | 1(2)   |
| O(17) | 36(1)  | 43(1)  | 35(1)  | -3(1)  | 1(1)   | -2(1)  |
| O(2)  | 37(1)  | 45(1)  | 43(2)  | -9(1)  | 1(1)   | -4(1)  |
| N(1)  | 38(2)  | 48(2)  | 49(2)  | 6(2)   | 4(1)   | 8(1)   |
| O(11) | 32(1)  | 39(1)  | 39(1)  | -7(1)  | 2(1)   | 0(1)   |
| O(6)  | 51(2)  | 54(2)  | 37(2)  | 1(1)   | -4(1)  | -3(1)  |
| O(8)  | 50(2)  | 46(2)  | 34(1)  | -1(1)  | -6(1)  | -2(1)  |
| O(10) | 59(2)  | 36(1)  | 42(2)  | -2(1)  | 3(1)   | -5(1)  |
| O(15) | 39(1)  | 53(2)  | 32(1)  | -1(1)  | 4(1)   | 7(1)   |
| O(14) | 41(1)  | 40(1)  | 53(2)  | 10(1)  | 4(1)   | 3(1)   |
| O(13) | 35(1)  | 52(2)  | 66(2)  | 18(1)  | 1(1)   | -4(1)  |
| O(16) | 50(2)  | 114(3) | 43(2)  | 12(2)  | -5(1)  | 9(2)   |
| C(39) | 60(3)  | 50(2)  | 74(3)  | 25(2)  | 7(2)   | 10(2)  |
| C(15) | 63(3)  | 66(3)  | 77(3)  | 25(2)  | -8(2)  | -9(2)  |
| C(34) | 38(2)  | 60(3)  | 94(4)  | -16(2) | 2(2)   | -2(2)  |
| C(31) | 65(3)  | 70(3)  | 56(3)  | -14(2) | 10(2)  | 4(2)   |
| C(32) | 72(3)  | 63(3)  | 72(3)  | -15(2) | -16(3) | 1(2)   |
| C(8)  | 49(2)  | 62(3)  | 57(3)  | -13(2) | 7(2)   | 2(2)   |
| C(9)  | 66(3)  | 73(3)  | 55(3)  | -22(2) | 9(2)   | 4(2)   |
| C(16) | 60(3)  | 59(3)  | 79(3)  | 6(2)   | -11(2) | -17(2) |
| C(37) | 71(3)  | 69(3)  | 53(3)  | -6(2)  | -16(2) | -5(2)  |
| C(17) | 81(4)  | 86(4)  | 61(3)  | -6(3)  | 19(3)  | 0(3)   |
| C(33) | 55(3)  | 63(3)  | 123(5) | -45(3) | 3(3)   | -14(2) |
| C(18) | 55(3)  | 60(3)  | 35(2)  | -6(2)  | 0(2)   | 3(2)   |
| C(19) | 62(3)  | 78(3)  | 45(2)  | 6(2)   | -11(2) | -8(2)  |
| C(20) | 139(5) | 42(3)  | 86(4)  | 10(3)  | -29(4) | -2(3)  |
| O(7)  | 65(2)  | 141(3) | 48(2)  | 5(2)   | 7(2)   | -1(2)  |

---

**Table 5:** Hydrogen coordinates (  $\times 10^4$ ) and isotropic displacement parameters ( $\text{\AA}^2 \times 10^3$ ) for sebd187.

|        | x     | y     | z     | U(eq) |
|--------|-------|-------|-------|-------|
| H(1)   | 13106 | -219  | 13777 | 49    |
| H(2)   | 7984  | -323  | 13784 | 50    |
| H(3)   | 8179  | 982   | 14667 | 57    |
| H(4)   | 12985 | 2560  | 13980 | 76    |
| H(5)   | 12886 | 1511  | 13052 | 56    |
| H(24)  | 4224  | 3620  | 8830  | 44    |
| H(12)  | 8778  | -3276 | 12718 | 57    |
| H(11)  | 7739  | -5114 | 12037 | 69    |
| H(10)  | 10431 | -5817 | 11367 | 66    |
| H(27)  | 9211  | 1951  | 9567  | 48    |
| H(26)  | 8780  | 752   | 8668  | 55    |
| H(23)  | 9324  | 3498  | 8783  | 47    |
| H(41A) | 10540 | 2004  | 7207  | 92    |
| H(41B) | 9792  | 3190  | 6763  | 92    |
| H(41C) | 8999  | 1573  | 6636  | 92    |
| H(2A)  | 7230  | 5306  | 8200  | 48    |
| H(42A) | 6758  | -1375 | 8881  | 94    |
| H(42B) | 5573  | -626  | 9408  | 94    |
| H(42C) | 8367  | -828  | 9426  | 94    |
| H(44A) | 2426  | 2205  | 10305 | 72    |
| H(44B) | 3590  | 3403  | 10730 | 72    |
| H(44C) | 3766  | 1775  | 10889 | 72    |
| H(30)  | 6689  | 6001  | 10337 | 65    |
| H(38A) | 2171  | 8814  | 8219  | 81    |
| H(38B) | 227   | 7547  | 8138  | 81    |
| H(38C) | 24    | 8924  | 7755  | 81    |
| H(22A) | 5886  | 1583  | 12296 | 85    |
| H(22B) | 6622  | 432   | 11837 | 85    |
| H(22C) | 7194  | 2072  | 11736 | 85    |
| H(25)  | 3901  | 2329  | 7948  | 51    |
| H(1A)  | 11197 | -1929 | 14377 | 53    |
| H(39A) | 5127  | 9297  | 7485  | 91    |

|        |       |       |       |     |
|--------|-------|-------|-------|-----|
| H(39B) | 3115  | 9406  | 6986  | 91  |
| H(39C) | 5189  | 8326  | 6920  | 91  |
| H(15A) | 9731  | -4820 | 15757 | 104 |
| H(15B) | 9531  | -5824 | 15199 | 104 |
| H(15C) | 7702  | -6044 | 15695 | 104 |
| H(34)  | 13267 | 7186  | 9865  | 77  |
| H(31)  | 6776  | 7960  | 10993 | 76  |
| H(32)  | 10104 | 9548  | 11044 | 83  |
| H(8)   | 15145 | -2746 | 11971 | 67  |
| H(9)   | 14046 | -4529 | 11303 | 78  |
| H(16A) | 6058  | -5608 | 14486 | 100 |
| H(16B) | 4244  | -4376 | 14564 | 100 |
| H(16C) | 4156  | -5716 | 14970 | 100 |
| H(37A) | 142   | 6003  | 7215  | 98  |
| H(37B) | 2117  | 6282  | 6758  | 98  |
| H(37C) | 39    | 7361  | 6819  | 98  |
| H(17A) | 6951  | -2949 | 15905 | 113 |
| H(17B) | 4718  | -4040 | 15869 | 113 |
| H(17C) | 4787  | -2710 | 15458 | 113 |
| H(33)  | 13246 | 9207  | 10462 | 98  |
| H(19A) | 15114 | 1229  | 15420 | 94  |
| H(19B) | 14329 | -12   | 15835 | 94  |
| H(19C) | 13850 | 1591  | 15999 | 94  |
| H(20A) | 11172 | 4758  | 13785 | 135 |
| H(20B) | 9679  | 4046  | 13252 | 135 |
| H(20C) | 12493 | 4247  | 13233 | 135 |

---
